# Supplementary material for: Native Rhizobia Improve Plant Growth, Fix N2, and Reduce Greenhouse Emissions of Sunnhemp More than Commercial Rhizobia Inoculants in Florida Citrus Orchards
Source: MDPI journal article supplement (doi:10.3390/plants11223011), 2022-11-08
Supplement: s1 [file s1]

## **Supplementary Material**

Native Rhizobia Improve Plant Growth, Fix N<sub>2</sub>, and Reduce Greenhouse Emissions of Sunnhemp More than Commercial Rhizobia Inoculants in Florida Citrus Orchards

Authors: Antonio Castellano-Hinojosa<sup>\*</sup>, Christoph Mora, and Sarah L. Strauss

Affiliations: Southwest Florida Research and Education Center, Department of Soil and Water Sciences, Institute of Food and Agricultural Sciences, University of Florida, 2685 State Rd 29N, Immokalee, FL, 34142, USA

\*Corresponding author:

Antonio Castellano-Hinojosa

Southwest Florida Research and Education Center, Department of Soil and Water Sciences, Institute of Food and Agricultural Sciences, University of Florida, 2685 State Rd 29N, Immokalee, FL, 34142, USA

[antonio.castella@ufl.edu](mailto:antonio.castella@ufl.edu)

**Table S1.** Soil physicochemical properties of the studied sites.

|                         | Citrus orchard A | Citrus orchard B |
|-------------------------|------------------|------------------|
| Soil texture            | Sandy            | Sandy            |
| Sand (%)                | 93.5             | 95.2             |
| Silt (%)                | 5.5              | 4.0              |
| Clay (%)                | 1                | 0.8              |
| Soil organic matter (%) | 2.2              | 1.1              |
| Ammonium (mg/kg)        | 6.7              | 2.4              |
| Nitrate (mg/kg)         | 8.4              | 2.6              |
| Soil pH                 | 7.4              | 7.1              |

**Table S2.** Identification of strains from nodules of sunnhemp (*Crotalaria juncea* L.). Closest relative type strains of the genera *Rhizobium* and *Bradyrhizobium* based on different targeted genes. Identity values are shown in brackets.

| Rhizobacterial strain | Closest relative type strains (Identity values are shown in brackets)                                                                                        |                                                 |                                                 |                                                 |                                                                                                                                                                                                                                                                        |                                                        |
|-----------------------|--------------------------------------------------------------------------------------------------------------------------------------------------------------|-------------------------------------------------|-------------------------------------------------|-------------------------------------------------|------------------------------------------------------------------------------------------------------------------------------------------------------------------------------------------------------------------------------------------------------------------------|--------------------------------------------------------|
|                       | Targeted gene                                                                                                                                                |                                                 |                                                 |                                                 |                                                                                                                                                                                                                                                                        |                                                        |
|                       | 16S rRNA                                                                                                                                                     | <i>recA</i>                                     | <i>glnII</i>                                    | <i>atpD</i>                                     | <i>nifH</i>                                                                                                                                                                                                                                                            | <i>nodC</i>                                            |
| COA3                  | <i>R. tropici</i> CIAT 899 <sup>T</sup> (99.06%), <i>R. freirei</i> PRF 81 <sup>T</sup> (99.25%), and <i>R. hainanense</i> CCBAU 57015 <sup>T</sup> (99.7%)  | <i>R. tropici</i> CIAT 899 <sup>T</sup> (95.7%) | <i>R. tropici</i> CIAT 899 <sup>T</sup> (96.7%) | <i>R. tropici</i> CIAT 899 <sup>T</sup> (95.9%) | <i>R. tropici</i> CIAT 899 <sup>T</sup> (99.2%), <i>R. multihospitium</i> CCBAU 83401 <sup>T</sup> (99.2%), and <i>R. lusitanum</i> P1-7 <sup>T</sup> (99.2%)                                                                                                          | <i>R. tropici</i> CIAT 899 <sup>T</sup> (99.1%)        |
| COA6                  | <i>R. tropici</i> CIAT 899 <sup>T</sup> (99.43%), <i>R. freirei</i> PRF 81 <sup>T</sup> (99.33%), and <i>R. hainanense</i> CCBAU 57015 <sup>T</sup> (99.43%) | <i>R. tropici</i> CIAT 899 <sup>T</sup> (99.6%) | <i>R. tropici</i> CIAT 899 <sup>T</sup> (99.7%) | <i>R. tropici</i> CIAT 899 <sup>T</sup> (99.7%) | <i>R. tropici</i> CIAT 899 <sup>T</sup> (99.2%), <i>R. multihospitium</i> CCBAU 83401 <sup>T</sup> (99.2%), and <i>R. lusitanum</i> P1-7 <sup>T</sup> (99.2%)                                                                                                          | <i>R. tropici</i> CIAT 899 <sup>T</sup> (99.2%)        |
| COB5                  | <i>R. tropici</i> CIAT 899 <sup>T</sup> (99.42%), <i>R. freirei</i> PRF 81 <sup>T</sup> (99.32%), and <i>R. hainanense</i> CCBAU 57015 <sup>T</sup> (99.41%) | <i>R. tropici</i> CIAT 899 <sup>T</sup> (99.6%) | <i>R. tropici</i> CIAT 899 <sup>T</sup> (99.8%) | <i>R. tropici</i> CIAT 899 <sup>T</sup> (99.6%) | <i>R. tropici</i> CIAT 899 <sup>T</sup> (99.2%), <i>R. multihospitium</i> CCBAU 83401 <sup>T</sup> (99.2%), and <i>R. lusitanum</i> P1-7 <sup>T</sup> (99.2%)                                                                                                          | <i>R. tropici</i> CIAT 899 <sup>T</sup> (99.2%)        |
| COB6                  | <i>R. tropici</i> CIAT 899 <sup>T</sup> (99.52%), <i>R. freirei</i> PRF 81 <sup>T</sup> (99.38%), and <i>R. hainanense</i> CCBAU 57015 <sup>T</sup> (99.38%) | <i>R. tropici</i> CIAT 899 <sup>T</sup> (99.6%) | <i>R. tropici</i> CIAT 899 <sup>T</sup> (99.7%) | <i>R. tropici</i> CIAT 899 <sup>T</sup> (99.6%) | <i>R. tropici</i> CIAT 899 <sup>T</sup> (99.2%), <i>R. multihospitium</i> CCBAU 83401 <sup>T</sup> (99.2%), and <i>R. lusitanum</i> P1-7 <sup>T</sup> (99.2%)                                                                                                          | <i>R. tropici</i> CIAT 899 <sup>T</sup> (99.2%)        |
| MI13                  | <i>B. japonicum</i> USDA6 <sup>T</sup> (99.85%), and <i>B. liaoningense</i> LMG18230 <sup>T</sup> (99.93%)                                                   | <i>B. japonicum</i> USDA6 <sup>T</sup> (99.5%)  | <i>B. japonicum</i> USDA6 <sup>T</sup> (99.6%)  | -                                               | <i>B. daqingense</i> CCBAU 15774 <sup>T</sup> (99.9%), <i>B. huanghuaihaiense</i> CCBAU 23303 <sup>T</sup> (99.9%), <i>B. ottawaense</i> OO99 <sup>T</sup> , <i>B. liaoningense</i> LMG 18230 <sup>T</sup> (99.9%), and <i>B. japonicum</i> USDA6 <sup>T</sup> (99.9%) | <i>B. yuanmingense</i> CCBAU10071 <sup>T</sup> (99.9%) |

**Table S3.** N<sub>2</sub>-fixation, nitrous oxide (N<sub>2</sub>O), and dinitrogen (N<sub>2</sub>) rates of rhizobial strains from nodules of sunnhemp (*Crotalaria juncea* L.) inoculated with soil from commercial orchards A and B (COA and COB, respectively) and the microbial inoculant (MI). Values represent the mean  $\pm$  standard error. For each gas analysis, numbers in a column followed by the same letter are not significantly different according to one-way ANOVA test (Tukey's HSD,  $p < 0.05$ ).

| Treatment | Nodules                                                          |                                                     |                                                     |
|-----------|------------------------------------------------------------------|-----------------------------------------------------|-----------------------------------------------------|
|           | N <sub>2</sub> -fixation (nmol                                   | N <sub>2</sub> O production (nmol                   | N <sub>2</sub> production (nmol                     |
|           | C <sub>2</sub> H <sub>4</sub> h <sup>-1</sup> mL <sup>-1</sup> ) | N <sub>2</sub> O h <sup>-1</sup> mL <sup>-1</sup> ) | N <sub>2</sub> O h <sup>-1</sup> mL <sup>-1</sup> ) |
| COA       | 102.7 $\pm$ 15.8a                                                | 18.7 $\pm$ 5.6b                                     | 1.5 $\pm$ 0.8a                                      |
| COB       | 140.4 $\pm$ 28.1a                                                | 22.8 $\pm$ 6.2b                                     | 1.0 $\pm$ 0.6a                                      |
| MI        | 48.2 $\pm$ 16.6b                                                 | 39.7 $\pm$ 8.5a                                     | 1.1 $\pm$ 0.9a                                      |

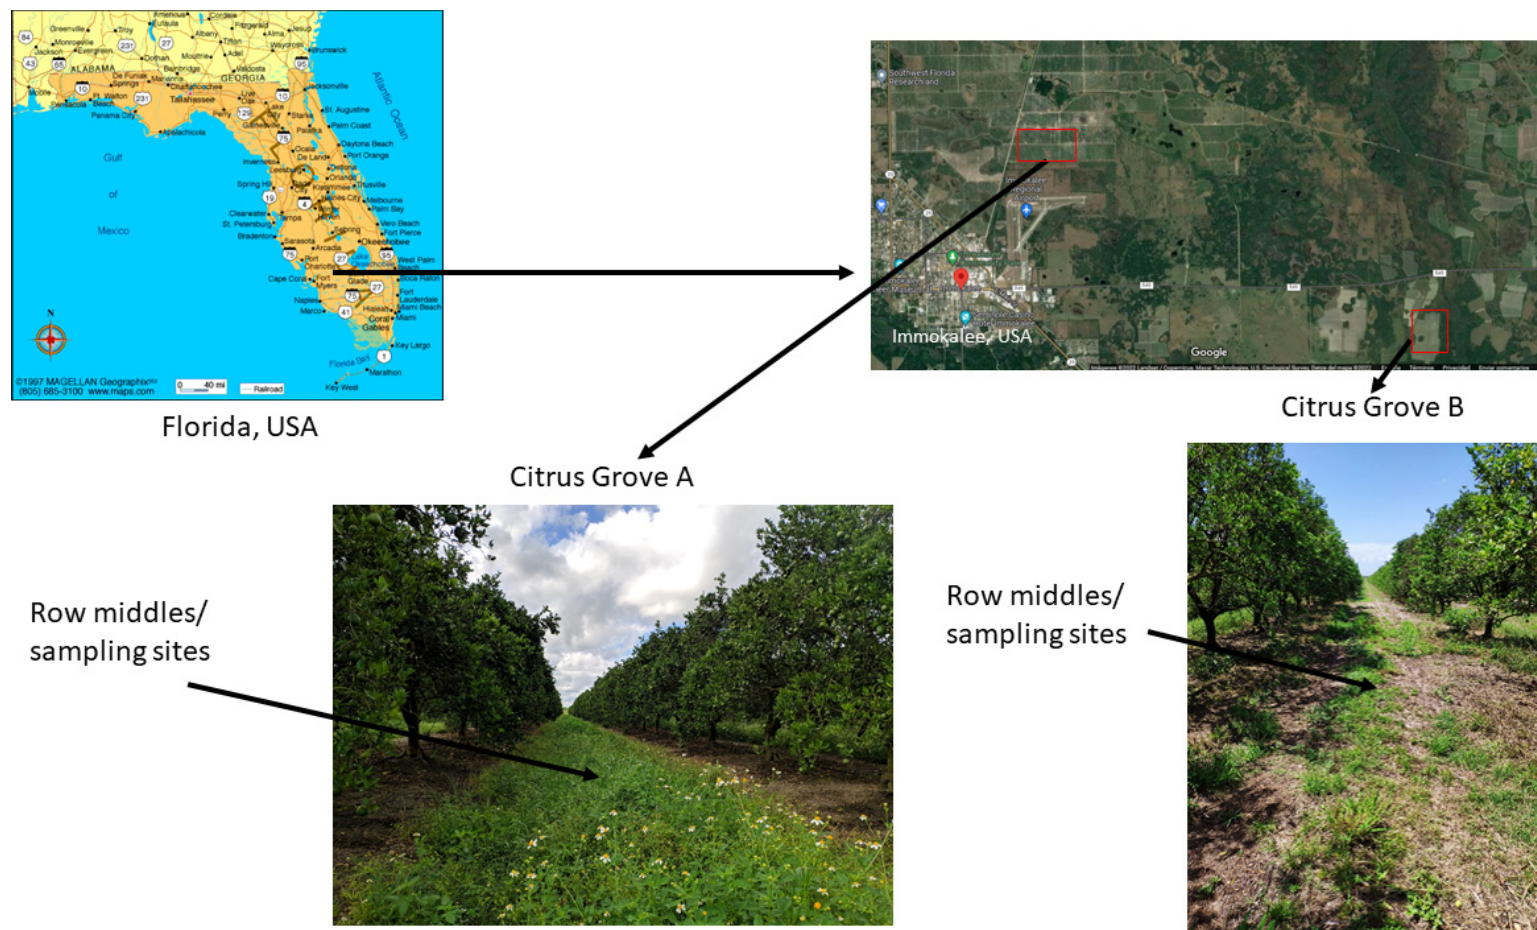

**Figure S1.** Map showing the location of the sampling sites within Citrus orchard A and Citrus orchard B.

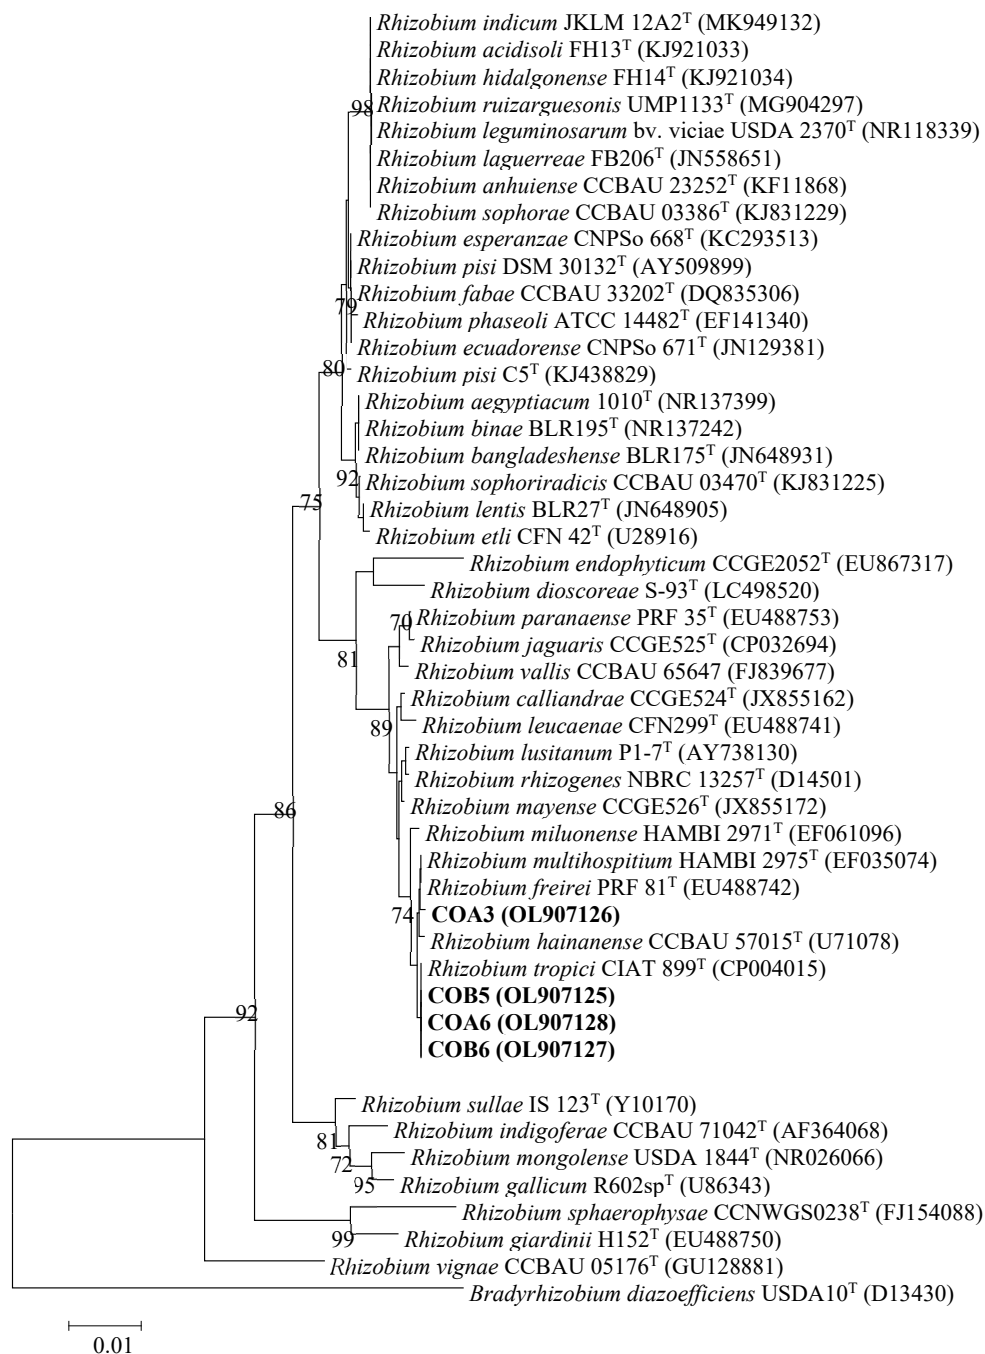

**Figure S2.** ML phylogenetic tree based on partial 16S rRNA sequences of strains from nodules of sunnhemp (*Crotalaria juncea* L.) and phylogenetically related species within the genus *Rhizobium*. The analysis was based on 1420 nucleotides. Isolates are denoted in bold. Bootstrap values are indicated as percentages derived from 1000 replications. Values lower than 70 are not shown. Bar, 1 nucleotides substitution per 100 nucleotides. The tree is rooted with *Bradyrhizobium diazoefficiens* USDA10<sup>T</sup>.

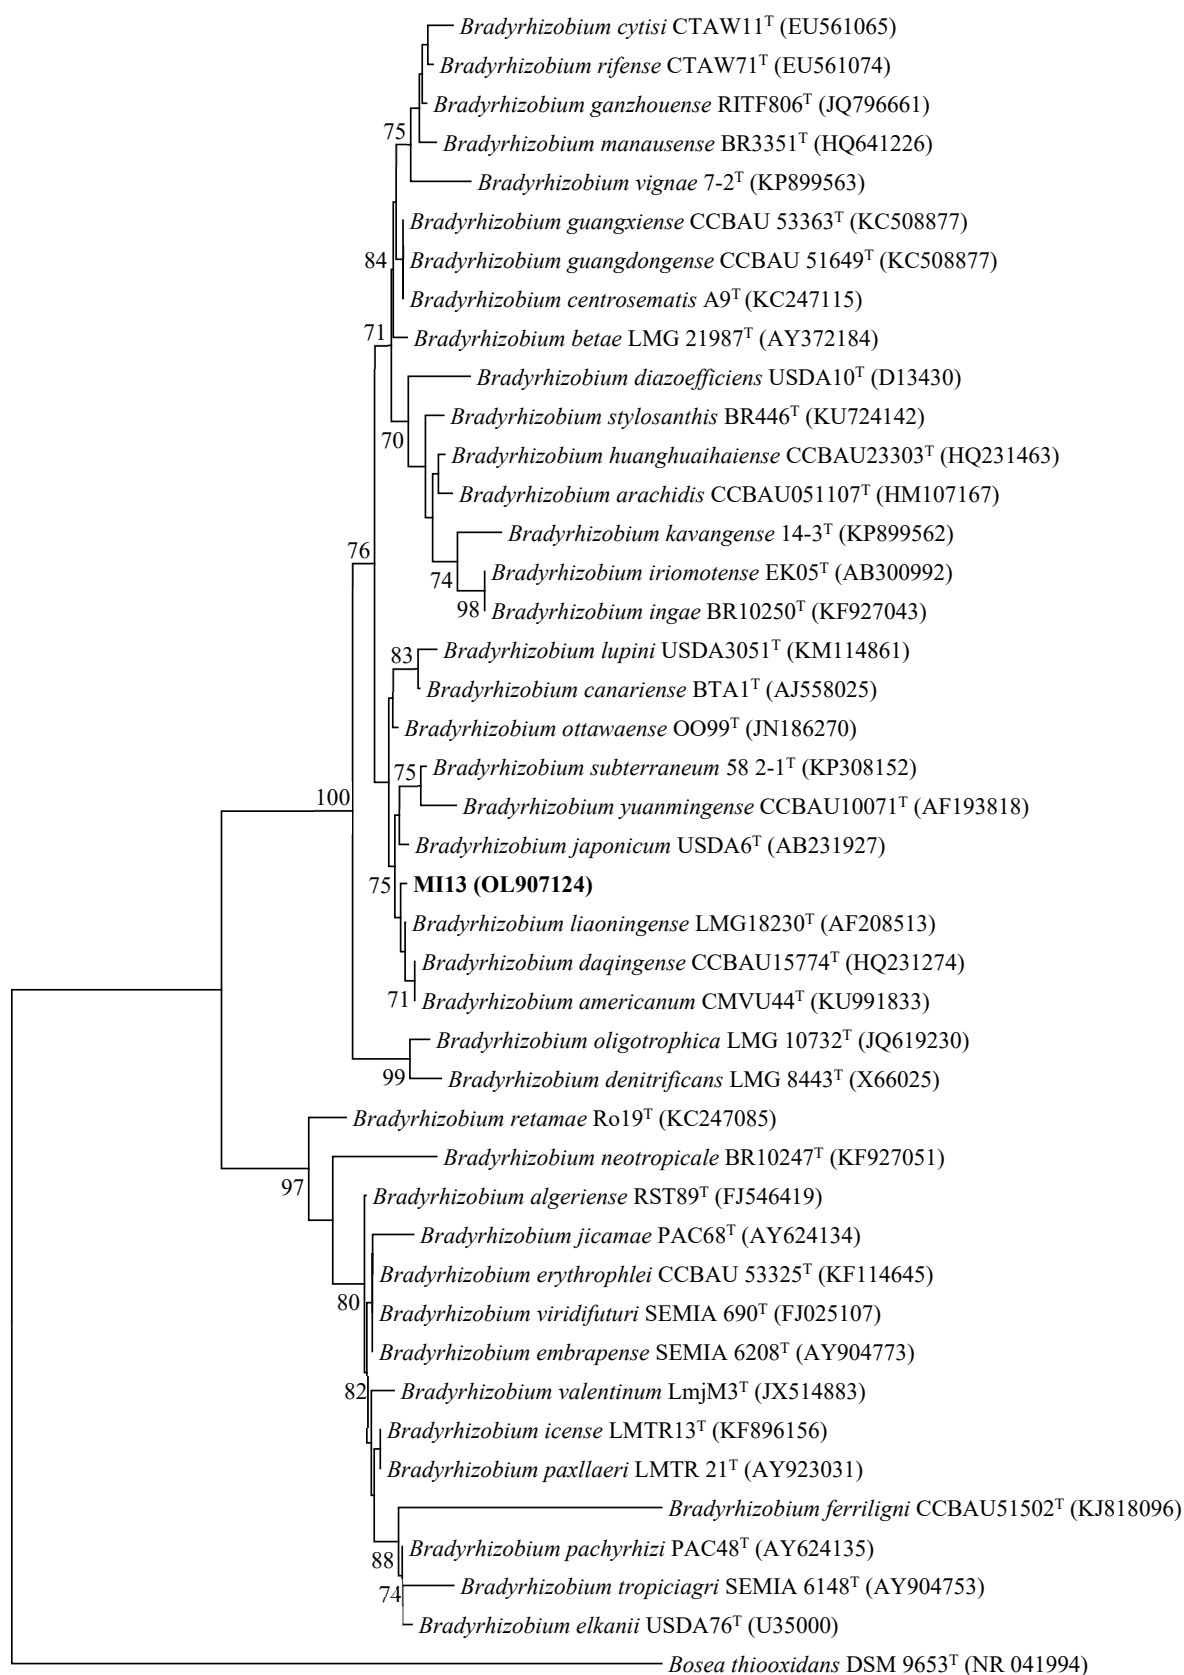

0.01

**Figure S3.** ML phylogenetic tree based on partial 16S rRNA sequences of strains from nodules of sunnhemp (*Crotalaria juncea* L.) and phylogenetically related species within the genus *Bradyrhizobium*. The analysis was based on 1415 nucleotides. Isolates are denoted in bold. Bootstrap values are indicated as percentages derived from 1000 replications. Values lower than 70 are not shown. Bar, 1 nucleotides substitution per 100 nucleotides. The tree is rooted with *Bosea thiooxidans* DSM 9653<sup>T</sup>.

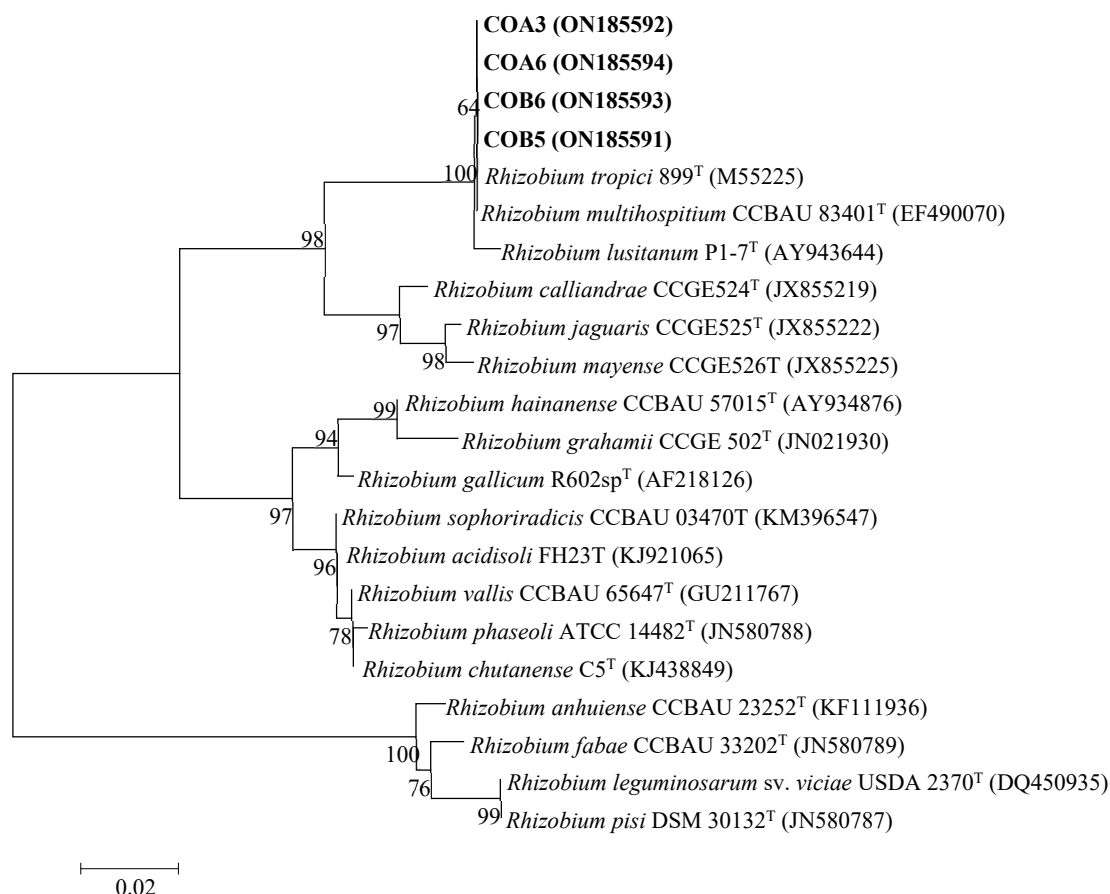

**Figure S4.** ML phylogenetic tree based on *nifH* sequences of strains from nodules of strains from nodules of sunnhemp (*Crotalaria juncea* L.) and phylogenetically related species within the genus *Rhizobium*. The analysis was based on 340 nucleotides. Isolates are denoted in bold. Bootstrap values are indicated as percentages derived from 1000 replications. Values lower than 70 are not shown. Bar, 2 nucleotide substitution per 100 nucleotides.

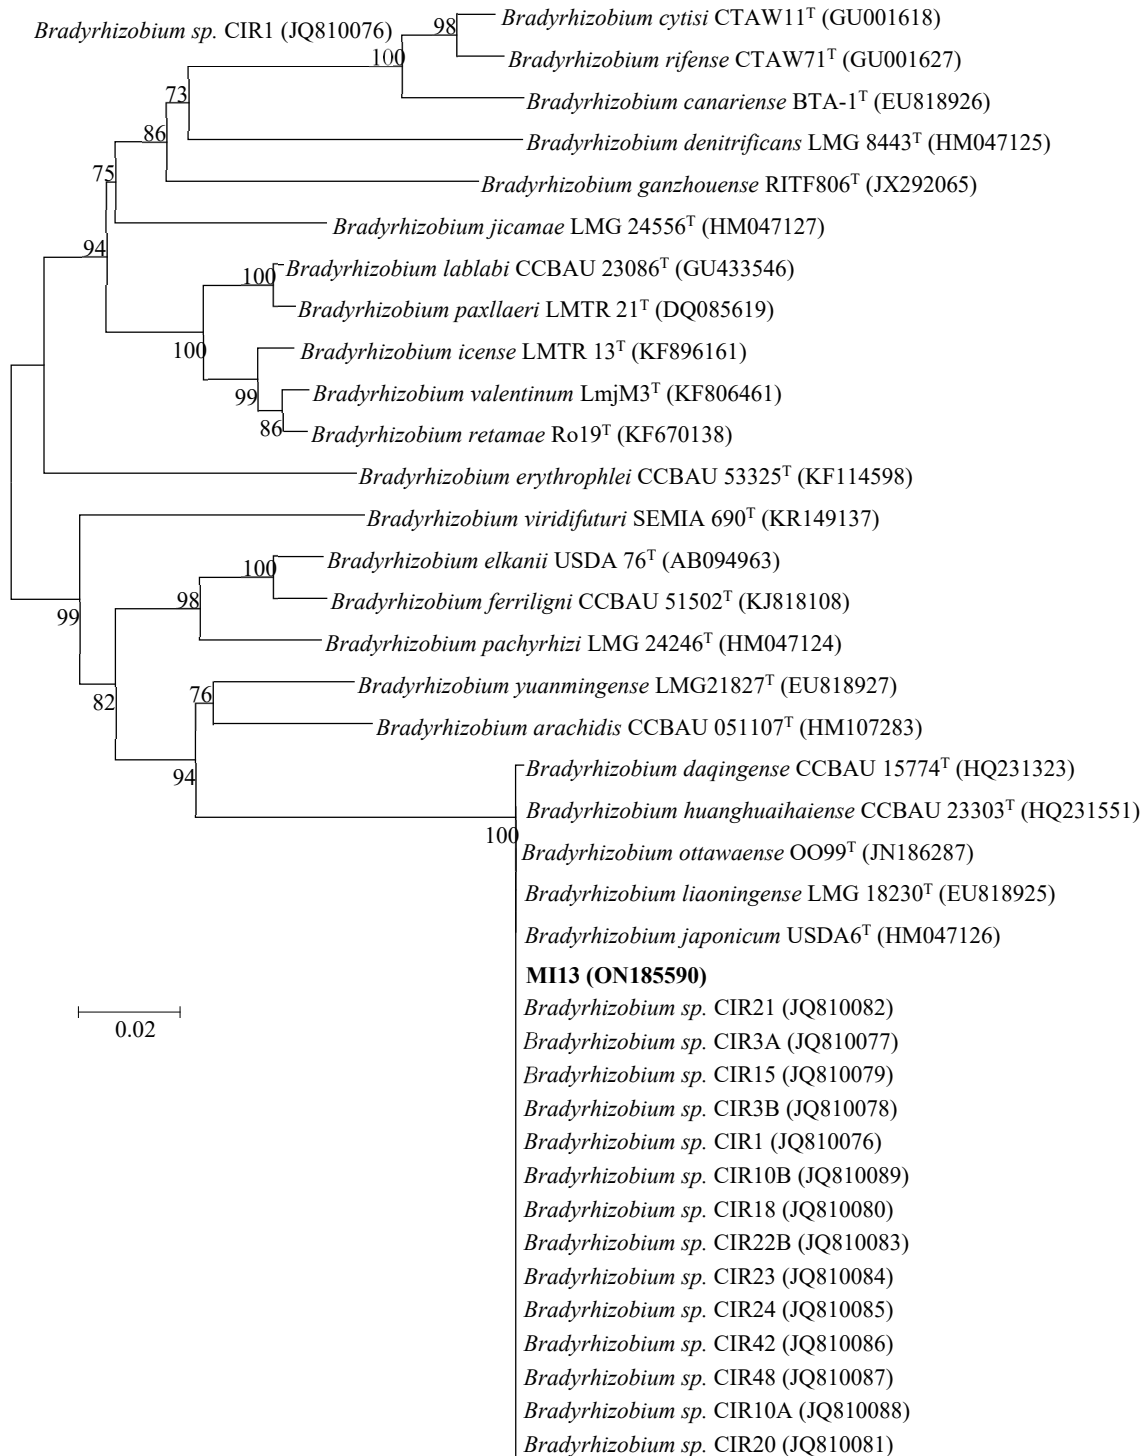

**Figure S5.** ML phylogenetic tree based on *nifH* sequences of strains from nodules of strains from nodules of sunnhemp (*Crotalaria juncea* L.) and phylogenetically related species within the genus *Bradyrhizobium*. The analysis was based on 420 nucleotides. Isolates are denoted in bold. Bootstrap values are indicated as percentages derived from 1000 replications. Values lower than 70 are not shown. Bar, 2 nucleotide substitution per 100 nucleotides.
